# Supplementary material
Source: PubMed Central journal article supplement (PMC8716653)
Supplement: 13193_2021_1347_MOESM1_ESM.pdf [file 13193_2021_1347_MOESM1_ESM.pdf]

Pre-anesthesia re-evaluation in post COVID-19 patients posted for elective surgeries: An online, cross-sectional survey.

Journal: Indian Journal of Surgical Oncology

#### Author Information

1. Dr Anjana S Wajekar, DNB, PDCC, Associate Professor, Department of Anaesthesiology, critical care and pain, ACTREC, Tata Memorial Centre, Homi Bhabha National Institute, Mumbai, Maharashtra, India.
2. Dr Sohan L Solanki, MD, PDCC, MAMS, Professor, Department of Anaesthesiology, critical care and pain, Tata Memorial Centre, Homi Bhabha National Institute, Mumbai, Maharashtra, India.
3. Dr Jigeeshu V Divatia, MD, Professor and Head, Department of Anaesthesiology, critical care and pain, Tata Memorial Centre, Homi Bhabha National Institute, Mumbai, Maharashtra, India.

Corresponding Author: Dr Anjana S Wajekar

Email : [anjanawajekar@gmail.com](mailto:anjanawajekar@gmail.com)

Pre-anesthesia re-evaluation in post COVID-19 patients posted for elective surgeries: An online, cross-sectional survey.

The authors are conducting this national level survey to collect data regarding the changes to the pre anaesthesia checkup in covid survivors coming up for elective surgeries. Participation is purely voluntary. By participating you are consenting to be included in the study, the results of which will be used for publication. There is no monetary compensation for your participation. We request you to recommend our questionnaire to all your anesthesiology colleagues.

### **Demographics**

Email id

Age <30 years, 31-40 years, 41-50 years, 51-60 years, >61 years

Sex

Anesthesiology Experience:

- Anesthesiology resident doctor (DA, MD, DNB) currently
- <5 years
- 5-25 years
- >25 years

Type of practice:

- Government/trust/public healthcare,
- corporate/private hospital,
- freelancing

Name of Institute -

### **Pre Anaesthesia Checkup (PAC)**

**Kindly select one option from the following.**

Q1. In your opinion, what is the ideal duration between covid negative report and day of elective surgery for daycare & minor surgeries? – No delay, >1 week, >2 weeks, > 4 weeks, >8 weeks.

Q2. In your opinion, what is the ideal duration between covid negative report and day of elective surgery for time sensitive major surgeries (eg Onco surgeries)? - No delay, >1 week, >2 weeks, > 4 weeks, >8 weeks.

Q3. In your opinion, what is the ideal duration between covid negative report and day of elective surgery for purely elective major surgeries? - No delay, >1 week, >2 weeks, > 4 weeks, >8 weeks

Q4. In your opinion, what are the adequate safety measures for your safety during the conduct of PAC of these patients?

1. Routine PAC (with contact) with use of N95 mask, gown, shield & gloves
2. Routine PAC (with contact) with use of personal protective equipment (PPE)
3. Contactless PAC with social distancing in same room with use of N95 mask and shield
4. Video-conferencing (TelePAC) with the patient

**Kindly select one or multiple options from the following.**

What are the modifications in PAC which need to be done in post-covid patients coming up for elective surgeries?

**Q5. Asymptomatic during covid (Patients who tested positive but had nil or mild symptoms and did not require hospitalization)**

1. No modifications
2. Post-covid fresh evaluation & optimisation of comorbidities, if any
3. Post-covid effort tolerance documentation
4. Breath holding time
5. 6 minute walk test
6. Post covid chest x-ray
7. Post covid electrocardiogram
8. Coagulation profile (PT, INR & D-dimer)
9. Arterial Blood Gas analysis
10. HRCT chest
11. Pulmonary Function Test
12. Troponin i levels
13. 2D echocardiography
14. Others:

**Q6. Mild hypoxia during covid (required upto 6L/min Oxygen by facemask)**

1. No modifications
2. Post-covid fresh evaluation & optimisation of comorbidities, if any
3. Post-covid effort tolerance documentation
4. Breath holding time
5. 6 min walk test
6. Post covid chest x-ray
7. Post covid electrocardiogram
8. Coagulation profile (PT, INR & D-dimer)
9. Arterial Blood Gas analysis
10. HRCT chest
11. Pulmonary Function Test
12. Troponin i levels
13. 2D echocardiography
14. Others:

**Q7. Moderate hypoxia during covid ( required >6L/min facemask, Non rebreathing bag mask, High frequency nasal oxygen, Non Invasive ventilation)**

1. No modifications
2. Post-covid fresh evaluation & optimisation of comorbidities, if any
3. Post-covid effort tolerance documentation
4. Breath holding time
5. 6 min walk test
6. Post covid chest x-ray
7. Post covid electrocardiogram

8. Coagulation profile (PT, INR & D-dimer)
9. Arterial Blood Gas analysis
10. HRCT chest
11. Pulmonary Function Test
12. Troponin i levels
13. 2D echocardiography
14. Others:

**Q8. Severe hypoxia requiring invasive ventilation during covid (intubation/tracheostomy)**

1. No modifications
2. Post-covid fresh evaluation & optimisation of comorbidities, if any
3. Post-covid effort tolerance documentation
4. Breath holding time
5. 6 min walk test
6. Post covid chest x-ray
7. Post covid electrocardiogram
8. Coagulation profile (PT, INR & D-dimer)
9. Arterial Blood Gas analysis
10. HRCT chest
11. Pulmonary Function Test
12. Troponin i levels
13. 2D echocardiography
14. Others:

**Q9. Significant Cardiac complaints (Arrhythmia, MI, myocarditis) during covid**

1. No modifications
2. Post-covid fresh evaluation & optimisation of comorbidities, if any
3. Post-covid effort tolerance documentation
4. Breath holding time
5. 6 min walk test
6. Post covid chest x-ray
7. Post covid electrocardiogram
8. Coagulation profile (PT, INR & D-dimer)
9. Arterial Blood Gas analysis
10. HRCT chest
11. Pulmonary Function Test
12. Troponin i levels
13. 2D echocardiography
14. Others:

**Q10. Patients coming for major abdominal, thoracic, cardiac, vascular surgeries**

1. No modifications
2. Post-covid fresh evaluation & optimisation of comorbidities, if any
3. Post-covid effort tolerance documentation

4. Breath holding time
5. 6 min walk test
6. Post covid chest x-ray
7. Post covid electrocardiogram
8. Coagulation profile (PT, INR & D-dimer)
9. Arterial Blood Gas analysis
10. HRCT chest
11. Pulmonary Function Test
12. Troponin i levels
13. 2D echocardiography
14. Others:

**Q11. Elderly Patients (> 65 years)**

1. No modifications
2. Post-covid fresh evaluation & optimisation of comorbidities, if any
3. Post-covid effort tolerance documentation
4. Breath holding time
5. 6 min walk test
6. Post covid chest x-ray
7. Post covid electrocardiogram
8. Coagulation profile (PT, INR & D-dimer)
9. Arterial Blood Gas analysis
10. HRCT chest
11. Pulmonary Function Test
12. Troponin i levels
13. 2D echocardiography
14. Others:

**Q12. Pediatric patients (<12 years)**

1. No modifications
2. Post-covid fresh evaluation & optimisation of comorbidities, if any
3. Post covid chest x-ray
4. Coagulation profile (PT, INR & D-dimer)
5. Arterial Blood Gas analysis
6. HRCT chest
7. Troponin i levels
8. 2D echocardiography
9. Others:

**Q13. Obstetric patients (Both obstetric and non-obstetric surgery)**

1. No modifications
2. Post-covid fresh evaluation & optimisation of comorbidities, if any
3. Post covid electrocardiogram
4. Coagulation profile (PT, INR & D-dimer)
5. Arterial Blood Gas analysis

6. Pulmonary Function Test
7. Troponin i levels
8. 2D echocardiography
9. Others:
